# Supplementary material for: Longitudinal change of selected human milk oligosaccharides and association to infants’ growth, an observatory, single center, longitudinal cohort study
Source: PubMed Central journal article supplement (PMC5300226; doi:10.1371/journal.pone.0171814), 2017-02-09
Supplement: pone.0171814.s005.pdf [file pone.0171814.s005.pdf]

raw data

| ID  | sex    | mode of delivery  | body length | body weight | head circumference |
|-----|--------|-------------------|-------------|-------------|--------------------|
|     |        |                   | birth       | birth       | birth              |
| 001 | Female | caesarean section | 50          | 3.165       | 33.5               |
| 002 | Male   | vaginal           | 50.5        | 3.735       | 34                 |
| 003 | Male   | vaginal           | 51          | 3.4         | 33.5               |
| 004 | Male   | vaginal           | 51          | 3.125       | 33.5               |
| 005 | Male   | vaginal           | 50.5        | 3.36        | 34                 |
| 006 | Female | vaginal           | 49          | 2.95        | 33.5               |
| 007 | Male   | caesarean section | 53          | 3.275       | 34                 |
| 008 | Female | caesarean section | 49          | 3.46        | 36                 |
| 009 | Female | caesarean section | 51          | 3.03        | 34                 |
| 010 | Female | caesarean section | 50          | 3.66        | 35.5               |
| 011 | Female | caesarean section | 51          | 3.19        | 35                 |
| 012 | Female | caesarean section | 53          | 3.29        | 35                 |
| 013 | Male   | vaginal           | 52          | 3.49        | 33.5               |
| 014 | Female | caesarean section | 51          | 3.365       | 33                 |
| 015 | Female | vaginal           | 50.5        | 3.295       | 34                 |
| 016 | Male   | vaginal           | 53          | 3.765       | 35.5               |
| 017 | Female | vaginal           | 50          | 3.495       | 34                 |
| 018 | Male   | vaginal           | 53          | 3.84        | 33                 |
| 019 | Female | vaginal           | 48          | 2.965       | 32                 |
| 020 | Female | caesarean section | 47          | 2.28        | 31.5               |
| 021 | Male   | vaginal           | 46          | 2.495       | 32                 |
| 022 | Female | caesarean section | 47          | 2.845       | 32                 |
| 023 | Male   | vaginal           | 47          | 2.91        | 33                 |
| 024 | Male   | vaginal           | 51          | 3.69        | 36                 |
| 025 | Male   | vaginal           | 53          | 3.55        | 33                 |
| 026 | Male   | vaginal           | 51          | 3.75        | 34                 |
| 027 | Male   | vaginal           | 48          | 3.105       | 33                 |
| 028 | Female | vaginal           | 46          | 3.095       | 34.5               |
| 029 | Male   | vaginal           | 54          | 3.64        | 35.5               |
| 030 | Female | vaginal           | 50          | 2.855       | 32.5               |
| 031 | Female | caesarean section | 50          | 3.255       | 35                 |
| 032 | Female | caesarean section | 50          | 3.33        | 34                 |
| 033 | Male   | vaginal           | 48          | 3.415       | 33                 |
| 034 | Male   | caesarean section | 52          | 3.1         | 32.5               |
| 035 | Female | vaginal           | 51          | 3.175       | 34                 |
| 036 | Male   | caesarean section | 50          | 2.98        | 34                 |
| 037 | Female | vaginal           | 53          | 3.65        | 35                 |
| 038 | Female | vaginal           | 45          | 2.34        | 33                 |
| 039 | Male   | caesarean section | 50          | 3.185       | 34                 |
| 040 | Male   | caesarean section | 52          | 3.59        | 35                 |
| 041 | Female | vaginal           | 50          | 3.048       | 35                 |
| 042 | Female | caesarean section | 51          | 3.485       | 35                 |
| 043 | Female | caesarean section | 55          | 3.595       | 35.5               |
| 044 | Female | vaginal           | 50          | 2.81        | 33                 |
| 045 | Female | vaginal           | 49          | 2.68        | 31                 |
| 046 | Male   | caesarean section | 54          | 3.65        | 33.5               |
| 047 | Male   | vaginal           | 53          | 3.89        | 33                 |
| 048 | Male   | vaginal           | 50          | 3.04        | 33.5               |
| 049 | Male   | vaginal           | 51.5        | 3.925       | 36                 |
| 050 | Male   | vaginal           | 50          | 3.175       | 34.5               |

raw data

| body length | body weight | head circumference | body length | body weight | head circumference |
|-------------|-------------|--------------------|-------------|-------------|--------------------|
| 1 month     | 1 month     | 1 month            | 2 month     | 2 month     | 2 month            |
| 55          | 4.482       | 37                 | 58.5        | 5.634       | 38.5               |
| 59          | 4.86        | 39                 | 61          | 6.35        | 40                 |
| 56          | 4.574       | 38                 | 58          | 5.63        | 40                 |
| 54          | 4.5         | 37                 | 59          | 5.455       | 39.5               |
| 57          | 4.616       | 38                 | 59          | 5.63        | 39.5               |
| 54          | 4.036       | 36                 | 58          | 5.134       | 37.5               |
| 55.5        | 4.534       | 38.5               | 61          | 6.034       | 40                 |
| 57          | 4.61        | 38                 | 57          | 5.49        | 40                 |
| 54          | 3.93        | 37                 | 58          | 5.42        | 40                 |
| 53          | 3.768       | 37                 | 57          | 5.062       | 38                 |
| 55          | 3.935       | 37                 | 59          | 5.14        | 39                 |
| 56          | 3.945       | 37                 | 59          | 4.89        | 39                 |
| 57          | 4.58        | 38                 | 60          | 5.985       | 39                 |
| 57          | 4.75        | 37                 | 61          | 5.98        | 38                 |
| 54          | 4.25        | 37.5               | 58          | 4.52        | 39                 |
| 59          | 5.51        | 39                 | 63          | 7.192       | 41                 |
| 58          | 5.015       | 37.5               | 61          | 5.98        | 38.5               |
| 59          | 5.135       | 38                 | 62          | 6.01        | 39                 |
| 52          | 3.46        | 35.5               | 56          | 4.43        | 37                 |
| 50.5        | 3.16        | 35                 | 56          | 4           | 36.5               |
| 53          | 3.65        | 36.5               | 57          | 4.944       | 38.5               |
| 53          | 3.872       | 35.5               | 56          | 5.208       | 37                 |
| 54.5        | 3.988       | 37                 | 58          | 4.86        | 39                 |
| 56          | 5.118       | 38                 | 57          | 6.076       | 40                 |
| 57          | 4.65        | 39.5               | 62          | 6.194       | 41                 |
| 54          | 4.62        | 36                 | 60          | 6.012       | 40                 |
| 53          | 4.318       | 38                 | 56          | 5.32        | 39                 |
| 54.5        | 3.766       | 37.5               | 55          | 4.714       | 39                 |
| 57          | 5.15        | 37                 | 60          | 5.886       | 38                 |
| 54          | 3.62        | 35.5               | 57          | 4.944       | 38                 |
| 55          | 4.08        | 38.5               | 57.5        | 4.98        | 40                 |
| 55          | 3.56        | 36                 | 57          | 4.356       | 38                 |
| 53          | 4.82        | 38                 | 58.5        | 5.55        | 40                 |
| 55          | 4.052       | 37                 | 58          | 4.994       | 39.8               |
| 53          | 3.58        | 37.5               | 56          | 5.1         | 39.5               |
| 55          | 3.882       | 36.5               | 61          | 5.758       | 39.5               |
| 57          | 4.69        | 38                 | 60          | 6.25        | 41                 |
| 51          | 3.3         | 35                 | 53          | 4.06        | 37                 |
| 54          | 4.202       | 37                 | 58          | 5.938       | 40                 |
| 56          | 4.436       | 37.5               | 59          | 5.528       | 38.5               |
| 55.5        | 3.736       | 37.5               | 59          | 4.824       | 38.5               |
| 57          | 4.715       | 40                 | 59          | 5.84        | 41                 |
| 57          | 4.902       | 37.5               | 60          | 5.99        | 39                 |
| 52          | 3.778       | 35                 | 55          | 5.075       | 37.5               |
| 52.5        | 3.782       | 35                 | 55.5        | 4.936       | 36.5               |
| 56          | 5.17        | 39                 | 61          | 6.685       | 41                 |
| 57          | 4.865       | 41                 | 62          | 6.372       | 42                 |
| 54          | 4.032       | 36.5               | 59          | 5.704       | 38.5               |
| 55          | 5.475       | 39                 | 60          | 6.312       | 40                 |
| 54          | 4.21        | 37                 | 57.5        | 5.1         | 39                 |

raw data

| body length | body weight | head circumference | BMI   | BMI     | BMI      |
|-------------|-------------|--------------------|-------|---------|----------|
| 4 month     | 4 month     | 4 month            | birth | 1 month | 2 months |
| 63          | 6.896       | 40.5               | 12.7  | 14.8    | 16.5     |
| 67          | 8.53        | 44                 | 14.6  | 14.0    | 17.1     |
| 62          | 6.845       | 42                 | 13.1  | 14.6    | 16.7     |
| 63          | 6.485       | 42                 | 12.0  | 15.4    | 15.7     |
| 66.5        | 8           | 43                 | 13.2  | 14.2    | 16.2     |
| 63          | 6.458       | 40                 | 12.3  | 13.8    | 15.3     |
| 66          | 7.445       | 43                 | 11.7  | 14.7    | 16.2     |
| 63          | 6.918       | 43.5               | 14.4  | 14.2    | 16.9     |
| 65          | 7.09        | 41                 | 11.6  | 13.5    | 16.1     |
| 62          | 6.53        | 40.5               | 14.6  | 13.4    | 15.6     |
| 64          | 6.786       | 42                 | 12.3  | 13.0    | 14.8     |
| 64          | 6.545       | 41                 | 11.7  | 12.6    | 14.0     |
| 66          | 8.1         | 43.5               | 12.9  | 14.1    | 16.6     |
| 67          | 7.73        | 41                 | 12.9  | 14.6    | 16.1     |
| 63          | 6.048       | 40.5               | 12.9  | 14.6    | 13.4     |
| 66.5        | 8.22        | 43                 | 13.4  | 15.8    | 18.1     |
| 67          | 6.748       | 41                 | 14.0  | 14.9    | 16.1     |
| 66          | 7.256       | 41                 | 13.7  | 14.8    | 15.6     |
| 60.5        | 5.828       | 38.5               | 12.9  | 12.8    | 14.1     |
| 59          | 4.935       | 38                 | 10.3  | 12.4    | 12.8     |
| 61          | 6.052       | 39                 | 11.8  | 13.0    | 15.2     |
| 60.5        | 6.476       | 39                 | 12.9  | 13.8    | 16.6     |
| 64          | 6.335       | 42                 | 13.2  | 13.4    | 14.4     |
| 64          | 7.78        | 42                 | 14.2  | 16.3    | 18.7     |
| 69          | 8.34        | 45                 | 12.6  | 14.3    | 16.1     |
| 65          | 7.335       | 42                 | 14.4  | 15.8    | 16.7     |
| 62          | 6.992       | 41.5               | 13.5  | 15.4    | 17.0     |
| 60          | 6.082       | 41                 | 14.6  | 12.7    | 15.6     |
| 67          | 7.378       | 41                 | 12.5  | 15.9    | 16.4     |
| 62          | 6.432       | 40.5               | 11.4  | 12.4    | 15.2     |
| 62          | 6.724       | 42                 | 13.0  | 13.5    | 15.1     |
| 61          | 5.358       | 40                 | 13.3  | 11.8    | 13.4     |
| 61          | 7.314       | 41.5               | 14.8  | 17.2    | 16.2     |
| 63          | 6.366       | 42                 | 11.5  | 13.4    | 14.8     |
| 62          | 7.322       | 42.5               | 12.2  | 12.7    | 16.3     |
| 67          | 7.784       | 42.5               | 11.9  | 12.8    | 15.5     |
| 67          | 8.324       | 43                 | 13.0  | 14.4    | 17.4     |
| 58          | 5.516       | 41                 | 11.6  | 12.7    | 14.5     |
| 65          | 7.822       | 43                 | 12.7  | 14.4    | 17.7     |
| 62          | 7.012       | 41                 | 13.3  | 14.1    | 15.9     |
| 64          | 6.442       | 42                 | 12.2  | 12.1    | 13.9     |
| 64          | 7.368       | 44                 | 13.4  | 14.5    | 16.8     |
| 65          | 7.634       | 42                 | 11.9  | 15.1    | 16.6     |
| 59          | 5.902       | 39.5               | 11.2  | 14.0    | 16.8     |
| 60          | 5.438       | 39.5               | 11.2  | 13.7    | 16.0     |
| 65          | 8.42        | 43                 | 12.5  | 16.5    | 18.0     |
| 67          | 8.02        | 43                 | 13.8  | 15.0    | 16.6     |
| 63          | 7.05        | 40.5               | 12.2  | 13.8    | 16.4     |
| 64          | 7.844       | 43                 | 14.8  | 18.1    | 17.5     |
| 60          | 6.248       | 41                 | 12.7  | 14.4    | 15.4     |

raw data

| BMI      | 2'FL mg/l | 2'FL mg/l | 2'FL mg/l | LNnT mg/l | LNnT mg/l | LNnT mg/l | LNT mg/l | LNT mg/l |
|----------|-----------|-----------|-----------|-----------|-----------|-----------|----------|----------|
| 4 months | 1 month   | 2 months  | 4 months  | 1 month   | 2 months  | 4 months  | 1 month  | 2 months |
| 17.4     | 32        | 23        | ND        | 157       | 59        | ND        | 1088     | 618      |
| 19.0     |           |           |           |           |           |           |          |          |
|          | 2864      | 2236      | 1765      | 362       | 172       | 82        | 678      | 372      |
| 17.8     | 2088      | 2331      | 2419      | 294       | 283       | 302       | 710      | 722      |
| 16.3     | 15        | 16        | 10        | 64        | 119       | 81        | 881      | 869      |
| 18.1     | 122       | 50        | 15        | 202       | 87        | 38        | 790      | 423      |
| 16.3     | 1209      | 843       | 781       | 417       | 224       | 182       | 1527     | 691      |
| 17.1     | 2513      | 1665      | 1499      | 130       | 59        | 22        | 916      | 471      |
| 17.4     | 1563      | 1364      | 829       | 130       | 100       | 51        | 904      | 659      |
| 16.8     | 27        | 14        | 10        | 158       | 70        | 49        | 1801     | 1220     |
| 17.0     | 3281      | 1836      | 1288      | 275       | 144       | 84        | 924      | 462      |
| 16.6     | 3209      | 1945      | n/a       | 209       | 105       | n/a       | 670      | 819      |
| 16.0     | 1718      | 1629      | 1414      | 203       | 130       | 60        | 768      | 517      |
| 18.6     | 2734      | 2125      | 1615      | 172       | 97        | 52        | 833      | 585      |
| 17.2     | 8         | 10        | 12        | 130       | 118       | 32        | 1533     | 1339     |
| 15.2     | 43        | 25        | 16        | 336       | 189       | 131       | 927      | 1043     |
| 18.6     | 44        | 37        | 22        | 268       | 143       | 90        | 1004     | 515      |
| 15.0     | 1751      | 2005      | 1277      | 233       | 194       | 105       | 390      | 521      |
| 16.7     | 2416      | 2105      | 1519      | 261       | 141       | 49        | 460      | 415      |
| 15.9     | 1390      | 1059      | 917       | 388       | 208       | 133       | 1290     | 619      |
| 14.2     | 2341      | 1772      | 1470      | 197       | 121       | 69        | 587      | 547      |
| 16.3     | 1492      | 1524      | 764       | 378       | 207       | 94        | 899      | 542      |
| 17.7     | 3310      | 3290      | 1907      | 219       | 235       | 110       | 627      | 599      |
| 15.5     | 15        | 21        | 15        | 214       | 56        | 81        | 1607     | 737      |
| 19.0     | 2106      | 1627      | 1209      | 331       | 121       | 30        | 1337     | 477      |
| 17.5     | 1189      | 1059      | 677       | 208       | 128       | 100       | 1735     | 1003     |
| 17.4     | 14        | 10        | 5         | 165       | 39        | 23        | 2491     | 810      |
| 18.2     | 3579      | 2836      | 2635      | 261       | 177       | 137       | 875      | 514      |
| 16.9     | 7         | 10        | 5         | 149       | 103       | 60        | 2041     | 1227     |
| 16.4     | 9         | 6         | 4         | 139       | 63        | 16        | 2094     | 1132     |
| 16.7     | 13        | 12        | 12        | 212       | 152       | 126       | 1166     | 906      |
| 17.5     | 1363      | 1039      | 712       | 169       | 118       | 45        | 1399     | 1039     |
| 14.4     | 1794      | 1640      | 1468      | 534       | 397       | 353       | 1596     | 1373     |
| 19.7     | 1207      | 950       | 927       | 285       | 221       | 87        | 2185     | 1836     |
| 16.0     | 1557      | 1204      | 1186      | 234       | 166       | 98        | 1242     | 1011     |
| 19.0     | 2017      | 1573      | 712       | 158       | 86        | 61        | 613      | 236      |
| 17.3     | 1853      | 1907      | 1306      | 229       | 144       | 110       | 1166     | 555      |
| 18.5     | 2682      | 1727      | 1511      | 489       | 224       | 204       | 931      | 312      |
| 16.4     | 32        | 24        | 15        | 310       | 202       | 123       | 1318     | 974      |
| 18.5     | 2132      | 1827      | 1494      | 124       | 56        | 20        | 977      | 565      |
| 18.2     | 1522      | 1587      | 1348      | 130       | 46        | 40        | 824      | 294      |
| 15.7     | 1588      | 1564      | 993       | 304       | 196       | 73        | 888      | 462      |
| 18.0     | 2217      | 1909      | 1520      | 274       | 177       | 103       | 1016     | 721      |
| 18.1     | 16        | 11        | 7         | 192       | 124       | 67        | 924      | 672      |
| 17.0     | 1322      | 1062      | 878       | 211       | 147       | 103       | 1148     | 385      |
| 15.1     | 4990      | 3863      | 3505      | 322       | 233       | 216       | 452      | 361      |
| 19.9     | 1682      | 1367      | 1260      | 260       | 273       | 211       | 1132     | 892      |
| 17.9     | 2387      | 1978      | 1590      | 316       | 184       | 127       | 988      | 594      |
| 17.8     | 2715      | 1532      | 1012      | 225       | 130       | 64        | 584      | 337      |
| 19.2     | 12        | 18        | 10        | 155       | 99        | 47        | 1178     | 783      |
| 17.4     | 16        | 15        | 7         | 174       | 127       | 23        | 2762     | 2254     |

raw data

| LNT<br>mg/l | 3'SL<br>mg/l | 3'SL<br>mg/l | 3'SL<br>mg/l | 6'SL<br>mg/l | 6'SL<br>mg/l | 6'SL<br>mg/l |
|-------------|--------------|--------------|--------------|--------------|--------------|--------------|
| 4 months    | 1 month      | 2 months     | 4 months     | 1 month      | 2 months     | 4 months     |
| 3           | 209          | 363          | 26           | 542          | 212          | ND           |
| 303         | 198          | 207          | 193          | 742          | 392          | 148          |
| 693         | 186          | 227          | 260          | 308          | 184          | 90           |
| 804         | 206          | 156          | 228          | 432          | 266          | 172          |
| 257         | 134          | 179          | 179          | 590          | 310          | 142          |
| 499         | 183          | 260          | 229          | 337          | 103          | 59           |
| 272         | 227          | 157          | 143          | 613          | 246          | 112          |
| 325         | 221          | 188          | 157          | 611          | 319          | 139          |
| 1084        | 176          | 257          | 215          | 425          | 259          | 150          |
| 275         | 157          | 124          | 112          | 889          | 348          | 132          |
| n/a         | 303          | 328          | n/a          | 799          | 352          | n/a          |
| 330         | 297          | 264          | 320          | 381          | 180          | 71           |
| 535         | 126          | 92           | 167          | 491          | 170          | 116          |
| 789         | 242          | 203          | 191          | 470          | 273          | 158          |
| 985         | 309          | 477          | 462          | 505          | 357          | 340          |
| 385         | 336          | 161          | 215          | 347          | 152          | 96           |
| 326         | 161          | 298          | 269          | 325          | 283          | 97           |
| 248         | 83           | 87           | 116          | 240          | 137          | 46           |
| 449         | 275          | 201          | 268          | 653          | 341          | 123          |
| 465         | 351          | 284          | 219          | 826          | 500          | 181          |
| 274         | 244          | 205          | 237          | 464          | 223          | 92           |
| 245         | 207          | 217          | 325          | 685          | 579          | 184          |
| 819         | 337          | 222          | 181          | 581          | 376          | 189          |
| 264         | 437          | 304          | 295          | 1000         | 386          | 96           |
| 707         | 296          | 240          | 182          | 507          | 333          | 111          |
| 421         | 217          | 244          | 258          | 428          | 125          | 56           |
| 547         | 164          | 177          | 108          | 391          | 174          | 87           |
| 799         | 427          | 238          | 278          | 516          | 228          | 72           |
| 659         | 333          | 274          | 221          | 575          | 299          | 142          |
| 986         | 168          | 231          | 226          | 596          | 355          | 198          |
| 444         | 175          | 170          | 189          | 881          | 483          | 172          |
| 906         | 173          | 161          | 194          | 208          | 68           | 69           |
| 1024        | 141          | 205          | 219          | 646          | 284          | 109          |
| 372         | 226          | 186          | 220          | 417          | 181          | 58           |
| 151         | 243          | 175          | 130          | 474          | 212          | 82           |
| 362         | 276          | 188          | 157          | 634          | 387          | 137          |
| 380         | 155          | 104          | 98           | 500          | 166          | 91           |
| 716         | 153          | 130          | 110          | 384          | 178          | 88           |
| 259         | 250          | 170          | 175          | 807          | 395          | 160          |
| 253         | 268          | 215          | 180          | 599          | 341          | 217          |
| 188         | 116          | 104          | 149          | 243          | 175          | 70           |
| 265         | 170          | 214          | 220          | 421          | 270          | 100          |
| 538         | 241          | 211          | 224          | 389          | 195          | 79           |
| 271         | 236          | 168          | 183          | 572          | 223          | 123          |
| 397         | 290          | 170          | 207          | 658          | 217          | 154          |
| 511         | 117          | 148          | 177          | 493          | 249          | 160          |
| 616         | 178          | 148          | 182          | 589          | 356          | 197          |
| 273         | 247          | 242          | 246          | 681          | 268          | 190          |
| 479         | 272          | 228          | 229          | 440          | 170          | 162          |
| 1524        | 388          | 321          | 287          | 714          | 478          | 211          |
